# Supplementary material
Source: publisher figshare collection journal article supplement (https://frontiersin.figshare.com/ndownloader/files/14530028)
Supplement: Supplementary file [file 14530028]

Relevant R and Bioconductor packages and versions used:

clusterProfiler\_3.8.1, GO.db\_3.6.0, mygene\_1.16.2,  
ReactomePA\_1.24.0, flashClust\_1.01-2, WGCNA\_1.64-1, fastcluster\_1.1.25,  
dynamicTreeCut\_1.63-1, lumi\_2.32.0,

hexbin\_1.27.2, vsn\_3.48.1, sva\_3.28.0, BiocParallel\_1.14.2, mgcv\_1.8-24, nlme\_3.1-  
137, genefilter\_1.62.0, rgl\_0.99.16,  
pd.mogene.1.0.st.v1\_3.14.1, DBI\_1.0.0, RSQLite\_2.1.1, affycoretools\_1.52.2,  
mogene10sttranscriptcluster.db\_8.7.0, org.Mm.eg.db\_3.6.0  
annotate\_1.58.0, XML\_3.98-1.16, AnnotationDbi\_1.42.1,  
oligo\_1.44.0, Biostrings\_2.48.0, affy\_1.58, limma\_3.36.5, oligoClasses\_1.42.0;

Gene filtering by variance was performed using genefilter package ( $IQR > 0.5$ )(1)  
PCA analysis of sample transcriptomes was performed using R function prcomp;  
hierarchical clustering analysis of samples transcriptomes was performed with  
flashClust and hclust R packages using euclidian distance.

PCA plotting using three first components was generated rgl package, a 3D real-time  
rendering system for R.

Weighted Correlation Network Analysis using WGCNA package was executed on  
Inflation and Exhaustion data sets estimating the beta parameter that would fit at  
best a scale free topology of the gene regulatory network (pickSoftThreshold  
algorithm in WGCNA was employed for analysis of scale free topology for multiple  
soft thresholding powers). We found that  $\beta=9$  would fit sufficiently a scale free  
topology (Fig 5S A) when using all genes without filtering by variance and  $\beta=20$   
(Fig 5S B) can be preferred when using the subset of high variable genes ( $IQR > 0.5$ ,  
1660 features from row data and excluding outlier, 2231 features when outliers are  
included); results are consistent with both beta values.

Enrichment of Reactome pathways was performed with R package ReactomePA and  
GSEA 3.0 java application ( $FDR < 0.25$ ).

Cytoscape v3.6 bioinformatics software platform was used to visualize hypothetical  
gene regulatory network in WGCNA detected modules.

Pavlidis template analysis was performed in TM4 MeV (Stand-Alone Client 4.8.1,  
mev.tm4.org).

Peak calling on ChIP-Seq data was performed using macs2 (v.2.0.10). Peak annotation using annotatePeaks.pl from Homer

Bioinformatics software (v4.10,  
<http://homer.ucsd.edu/homer/ngs/annotation.html>)

1. Gentleman R, Carey V, Huber W, Irizarry R, Dudoit S. *Bioinformatics and Computational Biology Solutions Using R and Bioconductor (Statistics for Biology and Health)*. Berlin, Heidelberg: Springer-Verlag (2005).
